# Supplementary material for: CRISPR/Cas9-Mediated Targeted Mutagenesis of BnaCOL9 Advances the Flowering Time of Brassica napus L
Source: Int J Mol Sci. 2022 Nov 29;23(23):14944. doi: 10.3390/ijms232314944 (PMC9740695; doi:10.3390/ijms232314944)
Supplement: Supplementary file 1 [file ijms-23-14944-s001.zip › Table S1.xlsx]

## Sheet: Sheet1
用于构建CR载体引物
	DT1-BsF: ATATATGGTCTCGATTGGGTATGGATGAAGTTGACTGTT
	DT1-F0: TGGGTATGGATGAAGTTGACTGTTTTAGAGCTAGAAATAGC
	DT2-R0: AACTCTCACATCAGCTCTTGCTCAATCTCTTAGTCGACTCTAC
	DT2-BsR: ATTATTGGTCTCGAAACTCTCACATCAGCTCTTGCTCAA
A05-T1F	caagttcttgtttgtttatggtgtttgaagg
A05-T1R	gtgatgtttctggaaaagacaatcgatgc
A05-T2F	agcaagtttgaagtgtattctaaatgaaacattc
A05-T2R	agcttcaccagctttgacaaatcttc
C05-T1F	ggatagtatggcattcatggtttatgatt
C05-T1R	caattccaccttgtccaaagagctctc
C05-T2F	gtgttttctaaacgagacattctttggct
C05-T2R	tgcatctactttgtttacctccttcag
A03-T1F	atggtttgaaggatgttggagtgag
A03-T1R	tgttgatgtttctggaaaagactatcgactc
A03-T2F	gcatcaatgaagtaagttgagtgttttct
A03-T2R	ggagaagaatccacttaatagcttctgg
C03-T1F	ctggaaatgctaagcaacatcaatgg
C03-T1R	caccttgtccaaagagatgtaccg
C03-T2F	gaagaaggctcgcaagtaagttataacc
C03-T2R	tcgtagtcataagcctcaccagctttaac
RT-AO5-1F	TTTGGACTTAGCTGGACAATCT
RT-AO5-2F	TTCTCTGGAGTCACAGGAGATA
RT-AO5-1R	AGCCAAGTCAACTTCATCCATA
RT-AO5-2R	AGGAAGCATTGTTATCCTGTGA
RT-C05-1F	CTCTTTGGACAAGGTGGAATTG
RT-C05-2F	GTTCGAAAACAGAGCCAATCAT
RT-C05-1R	GAATCATCATTGCTCTCAGCTG
RT-C05-2R	AGGAAGCATTGTTATCCTGTGA
RT-C03-1F	TTCAGACTTAGCAGGAGAATCC
RT-C03-2F	TAAGGATGTTGGAGTGTGTGAA
RT-C03-1R	TTCATCCATACCCAAGTTTCCA
RT-C03-2R	TTCCAAAGAGCTCTTCGTAGTT
RT-SOC1-F	ATAGAGAATGCAACAAGCAGACAAG
RT-SOC1-R	GGTATCTTGCATATTGGAGCTGGC
RT-BnCOS-F	CCAACTTGAAGAAACAAGAGGAAACTT
RT-BnCOs-R	AACTGTTTTGTCAGGTGCTGTCTG
RT-BnFTs-F	TGGTGGAGAAGACCTAAGGAAC
RT-BnFTs-R	AACAATACSAGCACGAKACGAT
BnActin-L	CTATCCTCCGTCTCGATCTCGC
BnActin-R	CTTAGCCGTCTCCAGCTCTTGC
LIC6.0-A05-F	attacgccgaggTCATGGGTTACATGTGTGACTTCTG
LIC6.0-A05-R	tagggaagaggTTCATAGCTTCTGGTTGGGGTG
LIC6.0-A03-F	acgccgaggTCATGGGTTACATGTGTGACTTCT
LIC6.0-A03-R	agggaagaggTTCATAGCTTCTGGTTGGGGTG
LIC6.0-C03-F	acgccgaggTCATGGGTTACATGTGTGACTTCT
LIC6.0-C03-R	agggaagaggTTCATAGCTTCTGGTTGGGGTG
LIC6.0-C05-F	acgccgaggTCATGGGTTACATGTGTGACTTCT
LIC6.0-C05-R	agggaagaggTTCGTAGCTTCTGGTTGGGGTG
RT-A03-1F	GCCAATCATTTGCTACACGTC
RT-A03-1R	CTTATCAAACTTGCGAGCCT
RT-A03-2F	GCTGAGAGTAATGATGACTCGT
RT-A03-2R	CTCTTATCAAACTTGCGAGCCT
GUS载体引物
AO5-BamHI-F	CGGGATCCCGCTTCTTTCACTGCTGTAATAAA
AO5-XbaI-R	CTAGTCTAGACTAGCAGGTGAACAATAGAATAAGAT
A03GUS-F	ggtcgactctagGCTGTACATTAAATTCATCCAAACTAAAA
A03GUS-R	cacccggggatcCTTCTTTACCAGATTTTAATTTCTGCTG
过表达引物
OE-BnaA05.COL9-F	tggatccatcgatagtactgtcgacATGGGTTACATGTGTGACTTCTGT
OE-BnaA05.COL9-R	gcccttgctcaccatggtaccATAGCTTCTGGTTGGGGTGAGT
用于检测的编辑类型的Hi-tom引物
ZH5-A05-1F	ggagtgagtacggtgtgccaagttcttgtttgtttatggtgtttgaagg
ZH5-A05-1R	gagttggatgctggatgggtgatgtttctggaaaagacaatcgatgc
ZH5-A05-2F	ggagtgagtacggtgtgcagcaagtttgaagtgtattctaaatgaaacattc
ZH5-A05-2R	gagttggatgctggatggagcttcaccagctttgacaaatcttc
ZH5-C05-1F	ggagtgagtacggtgtgcggatagtatggcattcatggtttatgatt
ZH5-C05-1R	gagttggatgctggatggcaattccaccttgtccaaagagctctc
ZH5-C05-2F	ggagtgagtacggtgtgcgtgttttctaaacgagacattctttggct
ZH5-C05-2R	gagttggatgctggatggtgcatctactttgtttacctccttcag
ZH5-A03-1F	ggagtgagtacggtgtgcatggtttgaaggatgttggagtgag
ZH5-A03-1R	gagttggatgctggatggtgttgatgtttctggaaaagactatcgactc
ZH5-A03-2F	ggagtgagtacggtgtgcgcatcaatgaagtaagttgagtgttttct
ZH5-A03-2R	gagttggatgctggatggggagaagaatccacttaatagcttctgg
ZH5-C03-1F	ggagtgagtacggtgtgcctggaaatgctaagcaacatcaatgg
ZH5-C03-1R	gagttggatgctggatggcaccttgtccaaagagatgtaccg
ZH5-C03-2F	ggagtgagtacggtgtgcgaagaaggctcgcaagtaagttataacc
ZH5-C03-2R	gagttggatgctggatggtcgtagtcataagcctcaccagctttaac

## Sheet: TableS1
Table S1 — All primers used in this study are listed below
Primers	Sequences (5'– 3')	Purpose
CR-COL9-DT1-BsF	ATATATGGTCTCGATTGGGTATGGATGAAGTTGACTGTT	Construct preparation for BnaCOL9 targeting
CR-COL9-DT1-F0	TGGGTATGGATGAAGTTGACTGTTTTAGAGCTAGAAATAGC
CR-COL9-DT2-R0	AACTCTCACATCAGCTCTTGCTCAATCTCTTAGTCGACTCTAC
CR-COL9-DT2-BsR	ATTATTGGTCTCGAAACTCTCACATCAGCTCTTGCTCAA
U626-IDF	TGTCCCAGGATTAGAATGATTAGGC	Identification of transgenic plants
U629-IDR	AGCCCTCTTCTTTCGATCCATCAAC
OE-BnaA05.COL9-F	tggatccatcgatagtactgtcgacATGGGTTACATGTGTGACTTCTGT	Construction of BnaA05COL9 overexpression vector
OE-BnaA05.COL9-R	gcccttgctcaccatggtaccATAGCTTCTGGTTGGGGTGAGT
LIC6.0-A05-F	attacgccgaggTCATGGGTTACATGTGTGACTTCTG	Construction of BnaCOL9 subcellular localization vector
LIC6.0-A05-R	tagggaagaggTTCATAGCTTCTGGTTGGGGTG
LIC6.0-A03-F	acgccgaggTCATGGGTTACATGTGTGACTTCT	Construction of BnaCOL9 subcellular localization vector
LIC6.0-A03-R	agggaagaggTTCATAGCTTCTGGTTGGGGTG
LIC6.0-C03-F	acgccgaggTCATGGGTTACATGTGTGACTTCT	Construction of BnaCOL9 subcellular localization vector
LIC6.0-C03-R	agggaagaggTTCATAGCTTCTGGTTGGGGTG
LIC6.0-C05-F	acgccgaggTCATGGGTTACATGTGTGACTTCT	Construction of BnaCOL9 subcellular localization vector
LIC6.0-C05-R	agggaagaggTTCGTAGCTTCTGGTTGGGGTG
A05GUS-F	gaccacccggggatccCTTCTTTCACTGCTGTAATAAA	Construction of GUS vector
A05GUS-R	gcaggtcgactctagaCAGGTGAACAATAGAATAAGATG
gus-R	ctgaatgcccacaggccg	Positive detection of GUS transgenic plants
M13-47	cgccagggttttcccagtcacgac
Cas9-F	GGGCAACTCCCGCTTCGCTT	Positive detection of CRISPR transgenic plants
Cas9-R	GCTCCTGGTCCACATACATA
RT-AO5-1F	TTTGGACTTAGCTGGACAATCT	qRT-PCR
RT-AO5-1R	AGCCAAGTCAACTTCATCCATA
RT-C05-1F	CTCTTTGGACAAGGTGGAATTG	qRT-PCR
RT-C05-1R	GAATCATCATTGCTCTCAGCTG
RT-C03-1F	TTCAGACTTAGCAGGAGAATCC	qRT-PCR
RT-C03-1R	TTCATCCATACCCAAGTTTCCA
RT-A03-2F	GCTGAGAGTAATGATGACTCGT	qRT-PCR
RT-A03-2R	CTCTTATCAAACTTGCGAGCCT
RT-SOC1-F	ATAGAGAATGCAACAAGCAGACAAG	qRT-PCR
RT-SOC1-R	GGTATCTTGCATATTGGAGCTGGC
RT-BnFT-F	TGGTGGAGAAGACCTAAGGAAC	qRT-PCR
RT-BnFT-R	AACAATACSAGCACGAKACGAT
RT-BnCO-F	CCAACTTGAAGAAACAAGAGGAAACTT	qRT-PCR
RT-BnCO-R	AACTGTTTTGTCAGGTGCTGTCTG
BnActin-F	CTATCCTCCGTCTCGATCTCGC	qRT-PCR
BnActin-R	CTTAGCCGTCTCCAGCTCTTGC
CR-COL9A05-1F	GGAGTGAGTACGGTGTGCCAAGTTCTTGTTTGTTTATGGTGTTTGAAGG	BnaCOL9 editing test
CR-COL9A05-1R	GAGTTGGATGCTGGATGGGTGATGTTTCTGGAAAAGACAATCGATGC
CR-COL9A05-2F	GGAGTGAGTACGGTGTGCAGCAAGTTTGAAGTGTATTCTAAATGAAACATTC
CR-COL9A05-2R	GAGTTGGATGCTGGATGGAGCTTCACCAGCTTTGACAAATCTTC
CR-COL9C05-1F	GGAGTGAGTACGGTGTGCGGATAGTATGGCATTCATGGTTTATGATT
CR-COL9C05-1R	GAGTTGGATGCTGGATGGCAATTCCACCTTGTCCAAAGAGCTCTC
CR-COL9C05-2F	GGAGTGAGTACGGTGTGCGTGTTTTCTAAACGAGACATTCTTTGGCT
CR-COL9C05-2R	GAGTTGGATGCTGGATGGTGCATCTACTTTGTTTACCTCCTTCAG
CR-COL9A03-1F	GGAGTGAGTACGGTGTGCATGGTTTGAAGGATGTTGGAGTGAG
CR-COL9A03-1R	GAGTTGGATGCTGGATGGTGTTGATGTTTCTGGAAAAGACTATCGACTC
CR-COL9A03-2F	GGAGTGAGTACGGTGTGCGCATCAATGAAGTAAGTTGAGTGTTTTCT
CR-COL9A03-2R	GAGTTGGATGCTGGATGGGGAGAAGAATCCACTTAATAGCTTCTGG
CR-COL9C03-1F	GGAGTGAGTACGGTGTGCCTGGAAATGCTAAGCAACATCAATGG
CR-COL9C03-1R	GAGTTGGATGCTGGATGGCACCTTGTCCAAAGAGATGTACCG
CR-COL9C03-2F	GGAGTGAGTACGGTGTGCGAAGAAGGCTCGCAAGTAAGTTATAACC
CR-COL9C03-2R	GAGTTGGATGCTGGATGGTCGTAGTCATAAGCCTCACCAGCTTTAAC
