# Supplementary material for: CRISPR/Cas9-Mediated Targeted Mutagenesis of BnaCOL9 Advances the Flowering Time of Brassica napus L
Source: Int J Mol Sci. 2022 Nov 29;23(23):14944. doi: 10.3390/ijms232314944 (PMC9740695; doi:10.3390/ijms232314944)
Supplement: Supplementary file 1 [file ijms-23-14944-s001.zip › Table S2.xlsx]

## Sheet: Sheet1
Table S2 Genotypic analysis of mutants for BnaCOL9
		Mutant type	Number of sgRNA reads	Mutant type	Number of sgRNA reads
T2-cr-6	A05	+A	9815
		-4D(GTTGG)	4263	A	24109
		WT	933
	C05	+A	10686	+T	14280
		WT	2591	+A	1977
		+T	4194
		+G	2466
	A03	+A	10627	+C	25181
		WT	2088
		+T	1421
		+G	280
	C03	WT	4905	+T	8331
		+A	1540	+A	5575
		+T	943	WT	2135
		-G	703	-G	1586
T2-cr-7	A05	WT	10529	+A	25926
		+A	1758
		-4D(GTTG）	1105
	C05	-5bp(ACTTG）	5305	WT	26849
		+T	3186
		+G	2945
		WT	1439
	A03	WT	4488	+C	25181
		+A	3095
		+T	2133
		+G	1898
	C03	WT	4067	+A	28900
		+A	3116
		+T	2194
		-G	2048
		-5D(ACTTG)	1058
T2-cr-9	A05	-4D(GTTG)	8777	+A	30760
		+A	2853
		+T	2152
	C05	+A	6675	+A	10872
		+T	4897	+T	2526
		WT	4212
		+G	2809
	A03	-G	18630	+C	26441
		+A	3808
		+T	3066
	C03	+A	4970	WT	22428
		+T	3460	+A	2403
		WT	2383
		-G	1966
